# Supplementary material
Source: PubMed Central journal article supplement (PMC6648986)
Supplement: ao8b03565_si_001.pdf [file ao8b03565_si_001.pdf]

# Supporting Information

## Hierarchically Porous Silica Prepared with Anionic Polyelectrolyte-Nonionic Surfactant Mesomorphous Complex as Dynamic Template

Chengxiang Shi,<sup>†</sup> Huan Wang,<sup>†</sup> Qiulin Bi,<sup>†</sup> Liqing Li,<sup>†</sup> Pingchuan Sun,<sup>‡</sup> <sup>||</sup>  
Tiehong Chen<sup>\*† ||</sup>

<sup>†</sup>Institute of New Catalytic Materials Science, School of Materials Science and Engineering, Key Laboratory of Advanced Energy Materials Chemistry (MOE), Nankai University, Tianjin 300350, PR China

<sup>‡</sup>Key Laboratory of Functional Polymer Materials of Ministry of Education, College of Chemistry, Nankai University, Tianjin 300071, PR China

<sup>||</sup> Collaborative Innovation Center of Chemical Science and Engineering (Tianjin), Tianjin 300071, PR China.

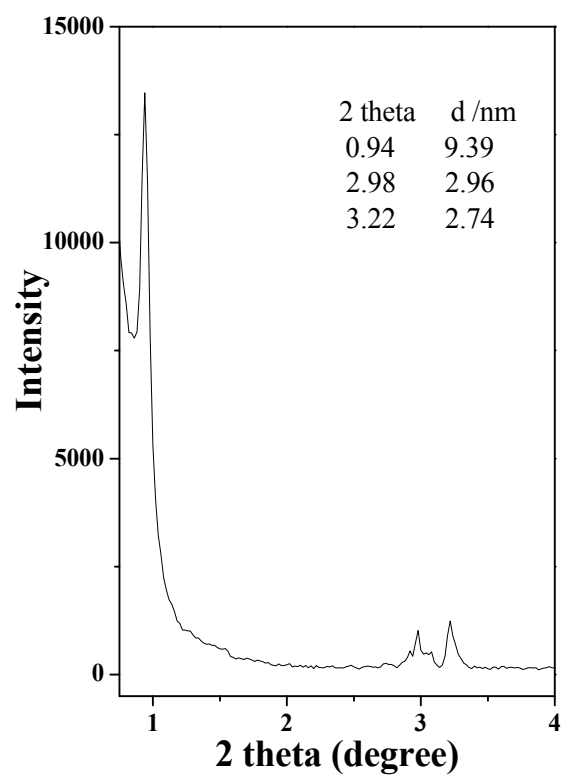

**Figure S1.** Small-angle XRD pattern of PAA/P123 organic complex.

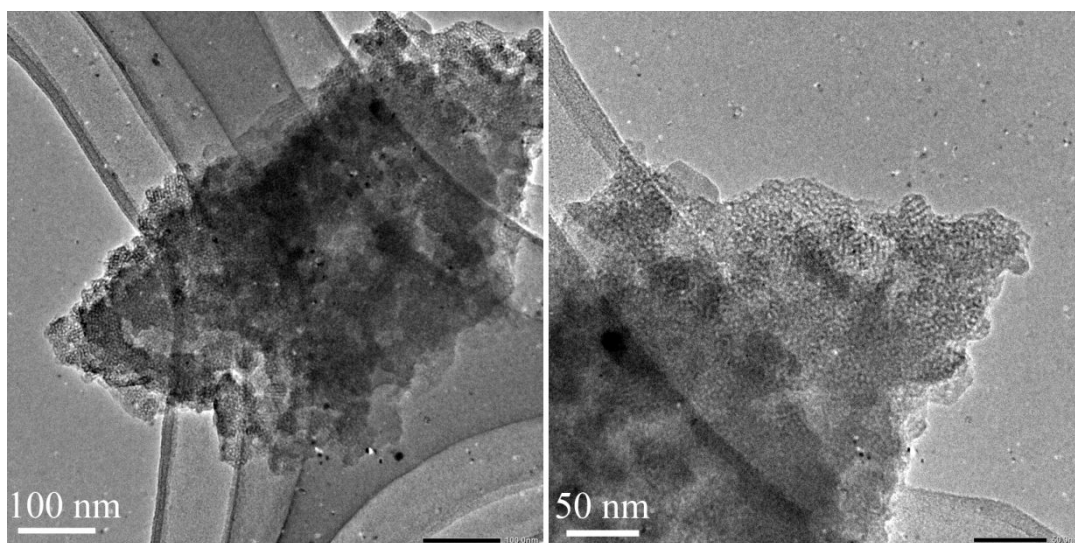

**Figure S2.** TEM images of the PAA/P123 complex.

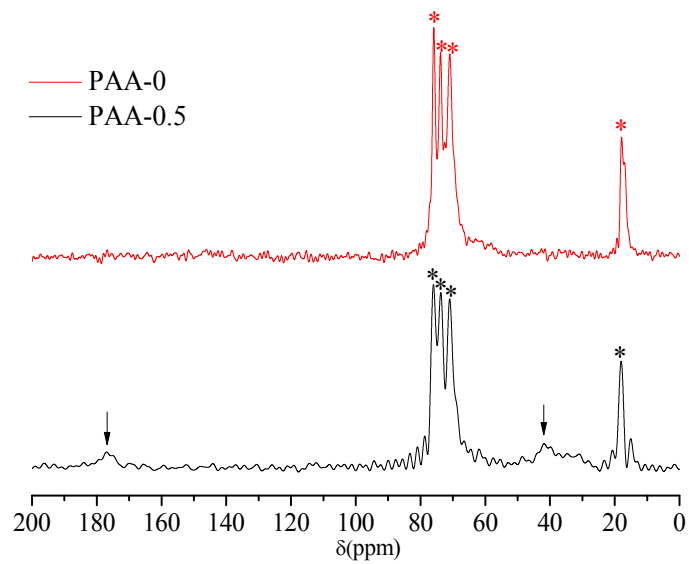

**Figure S3.**  $^{13}\text{C}$  CPMAS NMR spectra of the as-synthesized samples PAA-0 and PAA-0.5. The arrows indicate the signal of PAA and the stars indicate the signal of P123.

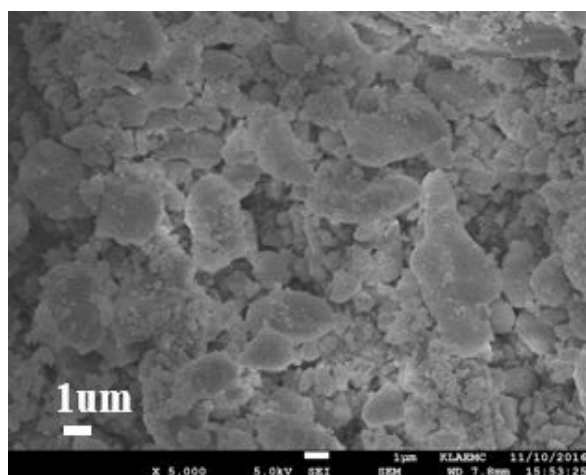

**Figure S4.** SEM image of the calcined PAA-0.5.

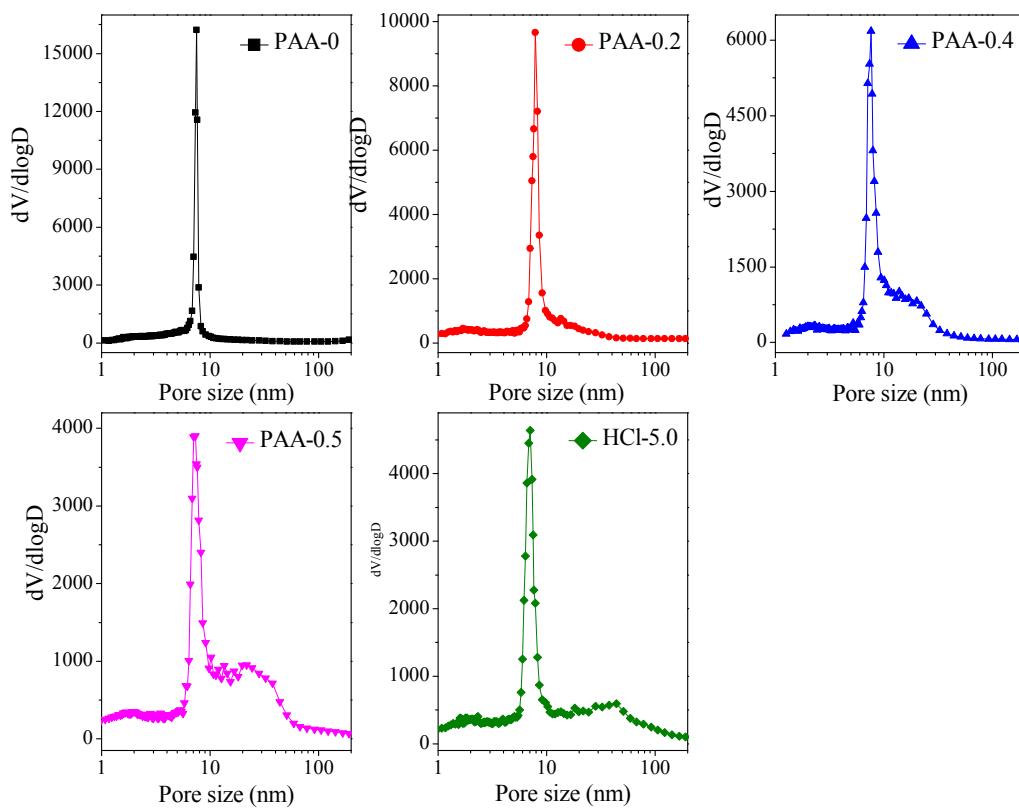

**Figure S5.** Pore size distribution curves of the calcined samples PAA-0, PAA-0.2, PAA-0.4, PAA-0.5 and HCl-5.0.
